# Supplementary material for: New Pd–Fe ferrocenyl antiparasitic compounds with bioactive 8-hydroxyquinoline ligands: a comparative study with their Pt–Fe analogues
Source: Royal Society of Chemistry journal article supplement (doi:10.1039/d0dt03963b), 2020-12-24
Supplement: d0dt03963b1.pdf [file d0dt03963b1.pdf]

## Supplementary information

### New Pd-Fe ferrocenyl antiparasitic compounds with bioactive 8-hydroxyquinoline

#### ligands: a comparative study with their Pt-Fe analogues

Feriannys Rivas<sup>a</sup>, Andrea Medeiros<sup>b,c</sup>, Cristina Quiroga<sup>b</sup>, Diego Benítez<sup>b</sup>, Marcelo

Comini<sup>b</sup>, Esteban Rodríguez Arce<sup>a</sup>, Hugo Cerecetto<sup>d</sup>, Dinorah Gambino<sup>a\*</sup>

**Table S1.** Crystal data and structure refinement results for [Pd<sup>II</sup>(L)(dppf)](PF<sub>6</sub>) compounds, where HL= HL1, HL3 and HL4.

|                                              | [Pd <sup>II</sup> (L1)(dppf)](PF <sub>6</sub> )                                  | [Pd <sup>II</sup> (L3)(dppf)](PF <sub>6</sub> )                                      | [Pd <sup>II</sup> (L4)(dppf)](PF <sub>6</sub> )                         |
|----------------------------------------------|----------------------------------------------------------------------------------|--------------------------------------------------------------------------------------|-------------------------------------------------------------------------|
| Empirical formula                            | C <sub>43</sub> H <sub>34</sub> F <sub>6</sub> FeNOP <sub>3</sub> Pd [+ solvent] | C <sub>43</sub> H <sub>32</sub> Cl <sub>2</sub> F <sub>6</sub> FeNOP <sub>3</sub> Pd | C <sub>43</sub> H <sub>32</sub> ClF <sub>6</sub> FeINOP <sub>3</sub> Pd |
| Formula weight                               | 949.93                                                                           | 1018.75                                                                              | 1109.20                                                                 |
| Temperature (K)                              | 298 (2)                                                                          | 298 (2)                                                                              | 298 (2)                                                                 |
| Wavelength (Å)                               | 0.71073                                                                          | 1.54178                                                                              | 1.54178                                                                 |
| Crystal system                               | Monoclinic                                                                       | Monoclinic                                                                           | Monoclinic                                                              |
| Space group                                  | P2 <sub>1</sub> /c                                                               | P2 <sub>1</sub> /c                                                                   | P2 <sub>1</sub> /c                                                      |
| Unit cell dimensions                         |                                                                                  |                                                                                      |                                                                         |
| a (Å)                                        | 10.6523 (4)                                                                      | 11.9767 (5)                                                                          | 12.1289 (2)                                                             |
| b (Å)                                        | 27.2163 (9)                                                                      | 36.8096 (16)                                                                         | 36.9940 (7)                                                             |
| c (Å)                                        | 16.1957 (6)                                                                      | 9.6399 (4)                                                                           | 9.7312 (2)                                                              |
| β (°)                                        | 101.297 (1)                                                                      | 110.311 (2)                                                                          | 110.7210 (10)                                                           |
| Volume (Å <sup>3</sup> )                     | 4604.4 (3)                                                                       | 3985.6 (3)                                                                           | 4083.92 (13)                                                            |
| Z, density (calculated, g cm <sup>-3</sup> ) | 4, 1.3702                                                                        | 4, 1.698                                                                             | 4, 1.804                                                                |
| Absorption coefficient (mm <sup>-1</sup> )   | 0.865                                                                            | 9.501                                                                                | 14.607                                                                  |
| F (000)                                      | 1912.0                                                                           | 2040.0                                                                               | 2180.0                                                                  |
| Crystal shape/color                          | Rectangular prism/brown                                                          | Rectangular prism/brown                                                              | Prism/brown                                                             |
| Crystal size (mm <sup>3</sup> )              | 0.185 × 0.222 × 0.383                                                            | 0.026 × 0.095 × 0.223                                                                | 0.052 × 0.062 × 0.175                                                   |
| θ-range (°) for data collection              | 2.9 to 25.41                                                                     | 3.94 to 68.40                                                                        | 4.78 to 68.35                                                           |
| Index ranges                                 | -12 ≤ h ≤ 12,<br>-32 ≤ k ≤ 32,<br>-19 ≤ l ≤ 19                                   | -14 ≤ h ≤ 14,<br>-44 ≤ k ≤ 44,<br>-11 ≤ l ≤ 8                                        | -13 ≤ h ≤ 14,<br>-44 ≤ k ≤ 44,<br>-11 ≤ l ≤ 9                           |
| Reflections collected                        | 71524                                                                            | 42643                                                                                | 30208                                                                   |
| Independent reflections                      | 8442                                                                             | 7286                                                                                 | 7446                                                                    |
| Observed reflections [I > 2σ(I)]             | 7530                                                                             | 6753                                                                                 | 6800                                                                    |
| Completeness (%)                             | 99.5                                                                             | 99.4                                                                                 | 99.3                                                                    |
| Absorption correction                        | multi-scan                                                                       | multi-scan                                                                           | multi-scan                                                              |
| Max. and min. transmission                   | 0.7457 and 0.6856                                                                | 0.4785 and 0.7531                                                                    | 0.4319 and 0.7531                                                       |
| Refinement method                            | Full-matrix least-squares                                                        | Full-matrix least-squares                                                            | Full-matrix least-squares                                               |

|                                                  | on F <sup>2</sup>         | on F <sup>2</sup>                                 | on F <sup>2</sup>                                 |
|--------------------------------------------------|---------------------------|---------------------------------------------------|---------------------------------------------------|
| Data/restraints/parameters                       | 8442/402/564              | 7286/225/582                                      | 7446/281/581                                      |
| Goodness-of-fit on F <sup>2</sup>                | 1.093                     | 1.020                                             | 1.094                                             |
| Final R indices <sup>a</sup> [I>2σ(I)]           | R1 = 0.0376, wR2 = 0.0880 | R <sub>1</sub> = 0.0255, wR <sub>2</sub> = 0.0616 | R <sub>1</sub> = 0.0312, wR <sub>2</sub> = 0.0744 |
| R indices (all data)                             | R1 = 0.0440, wR2 = 0.0929 | R <sub>1</sub> = 0.0284, wR <sub>2</sub> = 0.0632 | R <sub>1</sub> = 0.0351, wR <sub>2</sub> = 0.0763 |
| Largest diff. peak and hole (e.Å <sup>-3</sup> ) | 0.58/-0.52                | 0.37/-0.35                                        | 0.59/-0.66                                        |

$$^a R_1 = \frac{\sum ||F_o| - |F_c||}{\sum |F_o|}, wR_2 = \left[ \frac{\sum w(|F_o|^2 - |F_c|^2)^2}{\sum w(|F_o|^2)} \right]^{1/2}$$

**Table S2.** Mobile phases: Gradients used in the HPLC experiment

| Tiempo (min) | % A      | % B      |
|--------------|----------|----------|
| 0 – 3        | 100      | 0        |
| 3 – 6        | 100 – 75 | 0 – 25   |
| 6 – 9        | 75 – 66  | 25 – 34  |
| 9 – 20       | 66 – 0   | 34 – 100 |
| 20 – 27      | 0        | 100      |
| 27 – 30      | 0 – 100  | 100 – 0  |

**Table S3.** Main FTIR bands for HL1 (8-hydroxyquinoline), HL3 (5,7-dichloro-8-quinolinol) and their [Pd(L)(dppf)](PF<sub>6</sub>) complexes (Pd-dppf-L) (cm<sup>-1</sup>).

|                                                                         | HL1       | Pd-dppf-L1 | HL3      | Pd-dppf-L3 |
|-------------------------------------------------------------------------|-----------|------------|----------|------------|
| <b>v(O-H)</b>                                                           | 3204 (m)  | -          | 3164 (m) | -          |
| <b>v(C=N)</b>                                                           | 1508 (vs) | 1501 (vs)  | 1498 (s) | 1492 (s)   |
| <b>v(C-N)</b>                                                           | 1286 (s)  | 1316 (m)   | 1275 (m) | 1286 (vw)  |
| <b>v(C-O)</b>                                                           | 1059 (s)  | 1110 (m)   | 1051 (w) | 1116 (w)   |
| v: stretching; vs very strong; s strong; m medium; w weak; vw very weak |           |            |          |            |

**Table S4.** Main FTIR bands for HL4 (5-chloro-7-iodo-8-quinolinol), HL5 (5,7-diiodo-8-quinolinol) and their [Pd(L)(dppf)](PF<sub>6</sub>) complexes (Pd-dppf-L) (cm<sup>-1</sup>).

|                                                                         | HL4      | Pd-dppf-L4 | HL5      | Pd-dppf-L5 |
|-------------------------------------------------------------------------|----------|------------|----------|------------|
| <b>v(O-H)</b>                                                           | 3172 (m) | -          | 3428 (m) | -          |
| <b>v(C=N)</b>                                                           | 1490 (s) | 1486 (m)   | 1483 (s) | 1480 (m)   |
| <b>v(C-N)</b>                                                           | 1273 (m) | 1311 (vw)  | 1269 (m) | 1307 (vw)  |
| <b>v(C-O)</b>                                                           | 1043 (w) | 1098 (m)   | 1043 (w) | 1096 (m)   |
| v: stretching; vs very strong; s strong; m medium; w weak; vw very weak |          |            |          |            |

**Table S5.** Main FTIR bands for HL2 (5-nitro-8-quinolinol) and [Pd(L2)(dppf)](PF<sub>6</sub>) (cm<sup>-1</sup>).

|                                                                         | HL2                 | Pd-dppf-L2         |
|-------------------------------------------------------------------------|---------------------|--------------------|
| <b>v(O-H)</b>                                                           | 3172 (m)            | -                  |
| <b>v(C=N)</b>                                                           | 1515(s)             | 1508 (s)           |
| <b>v(N-O)<sub>as/s</sub></b>                                            | 1511 (vs) /1289 (s) | 1508(s) /1291 (vs) |
| <b>v(C-N)</b>                                                           | 1273 (m)            | 1311 (vw)          |
| <b>v(C-O)</b>                                                           | 1043 (w)            | 1113 (vw)          |
| v: stretching; vs very strong; s strong; m medium; w weak; vw very weak |                     |                    |

**Table S6.**  $^1\text{H}$  NMR chemical shift values ( $\delta$ , in ppm) of the ligands and the complexes in  $\text{DMSO}-d_6$ .

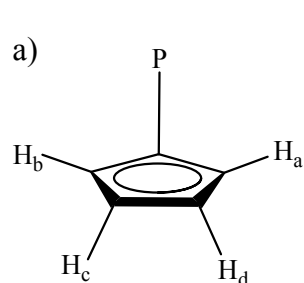

**Cp ring (dppf)**

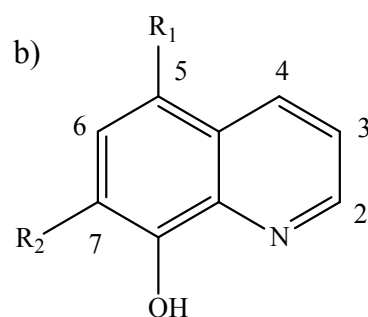

**8-hydroxyquinoline**

| Code | R <sub>1</sub>  | R <sub>2</sub> |                                     |
|------|-----------------|----------------|-------------------------------------|
| HL1  | H               | H              | <b>8-hydroxyquinoline</b>           |
| HL2  | NO <sub>2</sub> | H              | <b>5-nitro-8-quinolinol</b>         |
| HL3  | Cl              | Cl             | <b>5,7-dichloro-8-quinolinol</b>    |
| HL4  | Cl              | I              | <b>5-chloro-7-iodo-8-quinolinol</b> |
| HL5  | I               | I              | <b>5,7-diiodo-8-quinolinol</b>      |

| H | $\delta_{\text{H}}$ (multiplicity, coupling constant (Hz))(integration) |                          |                  |                         |                          |                  |                         |             |                  |                         |                   |                  |                         |               |                  |
|---|-------------------------------------------------------------------------|--------------------------|------------------|-------------------------|--------------------------|------------------|-------------------------|-------------|------------------|-------------------------|-------------------|------------------|-------------------------|---------------|------------------|
|   | HL1                                                                     | Pd-dppf-L1               | $\Delta\delta^a$ | HL2                     | Pd-dppf-L2               | $\Delta\delta^a$ | HL3                     | Pd-dppf-L3  | $\Delta\delta^a$ | HL4                     | Pd-dppf-L4        | $\Delta\delta^a$ | HL5                     | Pd-dppf-L5    | $\Delta\delta^a$ |
| 2 | 8.84 (dd, 4.1, 1.6) (1)                                                 | 8.43 (d, 8.0) (1)        | -0.41            | 9.02 (dd, 4.1, 1.2) (1) | 9.31 (d, 8.9) (1)        | 0.29             | 9.00 (d, 3.3) (1)       | 8.55 (m)(1) | -0.45            | 8.97 (dd, 4.2, 1.4) (1) | 8.54 (d, 8.5) (1) | -0.43            | 8.87 (dd, 4.1, 1.0) (1) | 8.34 (br) (1) | -0.53            |
| 3 | 7.54 (dd, 8.3, 4.2) (1)                                                 | 7.10 (m)(1) <sup>c</sup> | -0.44            | 7.89 (dd, 8.9, 4.1) (1) | 7.42 (dd, 8.9, 5.0) (1)  | -0.47            | 7.75 (dd, 8.5, 4.2) (1) | 7.26 (m)(2) | -0.49            | 7.77 (dd, 8.6, 4.2) (1) | 7.24 (m) (1)      | -0.53            | 7.73 (dd, 8.5, 4.1) (1) | 7.19 (br) (1) | -0.54            |
| 4 | 8.31 (dd, 8.3, 1.6) (1)                                                 | 7.15 (m)(1)              | -1.16            | 9.15 (dd, 8.9, 1.1) (1) | 7.54 (m)(1) <sup>b</sup> | -1.61            | 8.50 (d, 8.5) (1)       | NA          | -                | 8.50 (dd, 8.5, 1.4) (1) | 7.08 (br) (1)     | -1.42            | 8.29 (dd, 8.6, 1.0) (1) | 7.04 (br) (1) | -1.25            |
| 5 | 7.38 (dd,                                                               | 7.10 (m)(1) <sup>c</sup> | -0.28            | -                       | -                        | -                | -                       | 4           | -                | -                       | -                 | -                | -                       | -             | -                |

|                |                         |                   |       |                   |                   |       |             |              |   |             |               |               |              |               |       |
|----------------|-------------------------|-------------------|-------|-------------------|-------------------|-------|-------------|--------------|---|-------------|---------------|---------------|--------------|---------------|-------|
|                | 8.2, 1.4) (1)           |                   |       |                   |                   |       |             |              |   |             |               |               |              |               |       |
| 6              | 7.44 (m) (1)            | 7.36 (t, 7.8) (1) | -0.08 | 8.55 (d, 8.8) (1) | 8.49 (d, 9.3) (1) | -0.06 | 7.82 (s)(1) | NA           | - | 8.00 (s)(1) | 7.92 (s) (1)  | -0.08         | 8.34 (s) (1) | 8.20 (br) (1) | -0.14 |
| 7              | 7.09 (dd, 7.4, 1.5) (1) | 6.30 (d, 7.7) (1) | -0.79 | 7.20 (d, 8.8) (1) | 6.22 (d, 9.3) (1) | -0.98 | -           | -            | - | -           | -             | -             | -            | -             | -     |
| H <sub>α</sub> | -                       | 5.07 (s)(2)       | 1.13  | -                 | 4.73 (s)(4)       | -     | -           | 5.18 (br)(2) | - | -           | 4.72 (s)(4)   | -             | -            | 4.72 (br) (4) | -     |
|                |                         | 3.82 (s)(2)       | -0.12 |                   |                   |       |             |              |   |             |               |               |              |               | -     |
| H <sub>β</sub> | -                       | 4.81 (s)(2)       | 0.54  | -                 | 4.60 (s)(2)       | -     | -           | 4.67 (br)(4) | - | -           | 4.47 (br) (2) | -             | -            | 4.57 (br) (2) | -     |
|                |                         | 4.59 (s)(2)       | 0.32  |                   | 4.30 (br) (2)     | -     |             | 3.72 (br)(2) | - |             |               | 4.29 (br) (3) |              | -             |       |

<sup>a</sup>:  $\Delta\delta: \delta_{\text{complex}} - \delta_{\text{ligand}}$

<sup>b</sup>: overlapped with PPh<sub>2</sub> protons signals

<sup>c</sup>: protons 3 and 5 show the same chemical shift, integrating the signal for two protons.

NA: Not assigned.

Multiplicity: s: singlet, d: doublet, dd: doublet of doublets, t: triplet, m: multiplet, br: broad.

**Table S7.** Retention time values for precursors [MCl<sub>2</sub>dppf], ligands HL4 and dppf and M-dppf-L4 compounds, M = Pd(II) or Pt(II) using DMSO as solvent at t = 0.

| Compounds                        | RT(min) |
|----------------------------------|---------|
| [Pd(L4)(dppf)](PF <sub>6</sub> ) | 24.797  |
| [Pt(L4)(dppf)](PF <sub>6</sub> ) | 24.433  |
| [PdCl <sub>2</sub> (dppf)]       | 22.165  |
| [PtCl <sub>2</sub> (dppf)]       | 21.807  |
| Dppf                             | 27.297  |
| HL4                              | 22.279  |

**Table S8.** Retention time (RT) values for M-dppf-L4 compounds, M = Pd(II) or Pt(II) in DMSO/10 mM Tris-HCl buffer solution pH 7.4 (4:1).

| Time     | RT (min)   |            |
|----------|------------|------------|
|          | Pd-dppf-L4 | Pt-dppf-L4 |
| t = 0    | 24.846     | 24.752     |
| t = 24 h | 24.862     | 24.713     |

**Table S9.** Stern-Volmer constants of the Pd-dppf-L compounds and their Pt analogues for the competitive binding to {DNA-EB} adduct in 5 % DMSO/Tris HCl medium. Quenching % is included for each Pd-dppf-L compound.

| Compound   | K <sub>SV</sub> (M <sup>-1</sup> ) | Log (K <sub>SV</sub> ) | Quenching (%) | Compound   | K <sub>SV</sub> (M <sup>-1</sup> ) <sup>a</sup> | Log (K <sub>SV</sub> ) <sup>a</sup> |
|------------|------------------------------------|------------------------|---------------|------------|-------------------------------------------------|-------------------------------------|
| Pd-dppf-L1 | 15957                              | 4.2                    | 60 (100 μM)   | Pt-dppf-L1 | 2102                                            | 3.3                                 |
| Pd-dppf-L2 | 6793                               | 3.8                    | 52 (110 μM)   | Pt-dppf-L2 | 7744                                            | 3.9                                 |
| Pd-dppf-L3 | 19525                              | 4.3                    | 75 (100μM)    | Pt-dppf-L3 | 3599                                            | 3.6                                 |
| Pd-dppf-L4 | 23471                              | 4.4                    | 77 (110μM)    | Pt-dppf-L4 | 6053                                            | 3.8                                 |
| Pd-dppf-L5 | 43942                              | 4.6                    | 77 (110μM)    | Pt-dppf-L5 | 3505                                            | 3.5                                 |

<sup>a</sup> Data from [10]

**Figures S1.** FTIR spectra in KBr pellets (4000 - 400  $\text{cm}^{-1}$ ) of complexes  $[\text{Pd}(\text{L})(\text{dppf})](\text{PF}_6)$ , where HL = HL1-HL5.

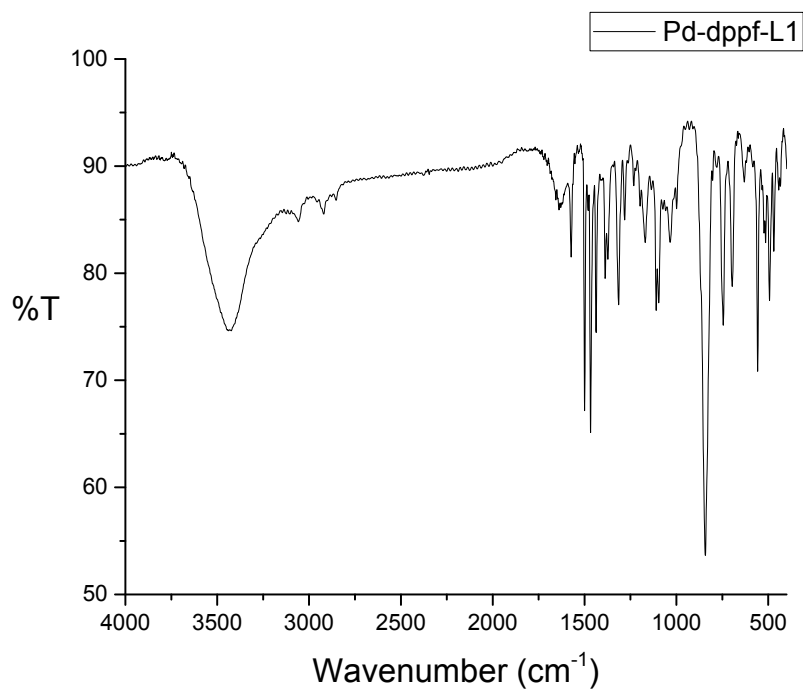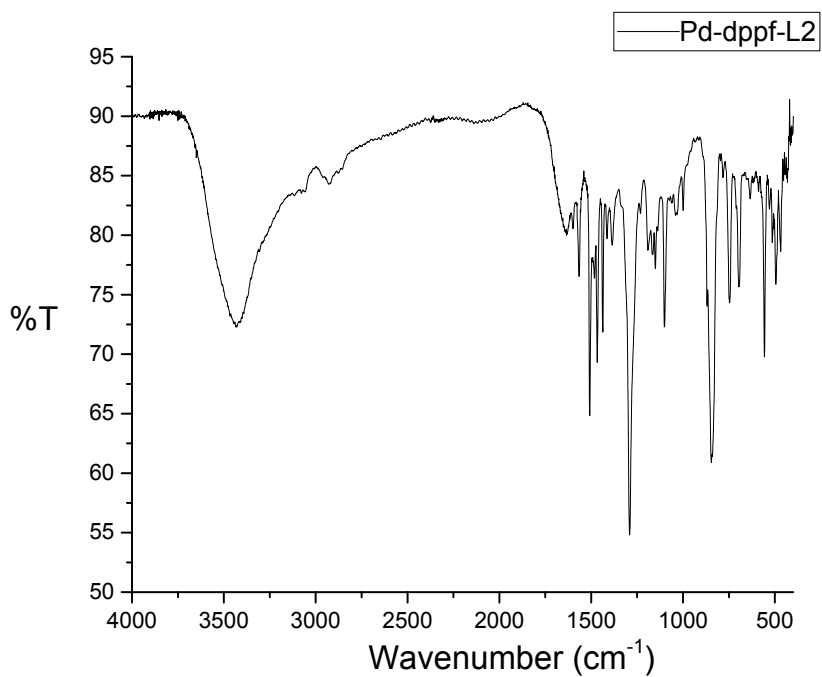

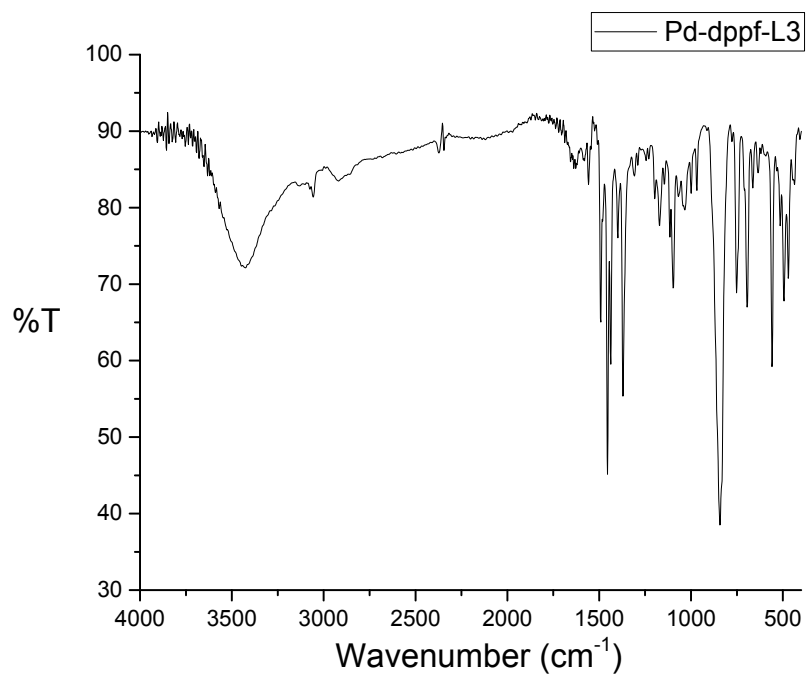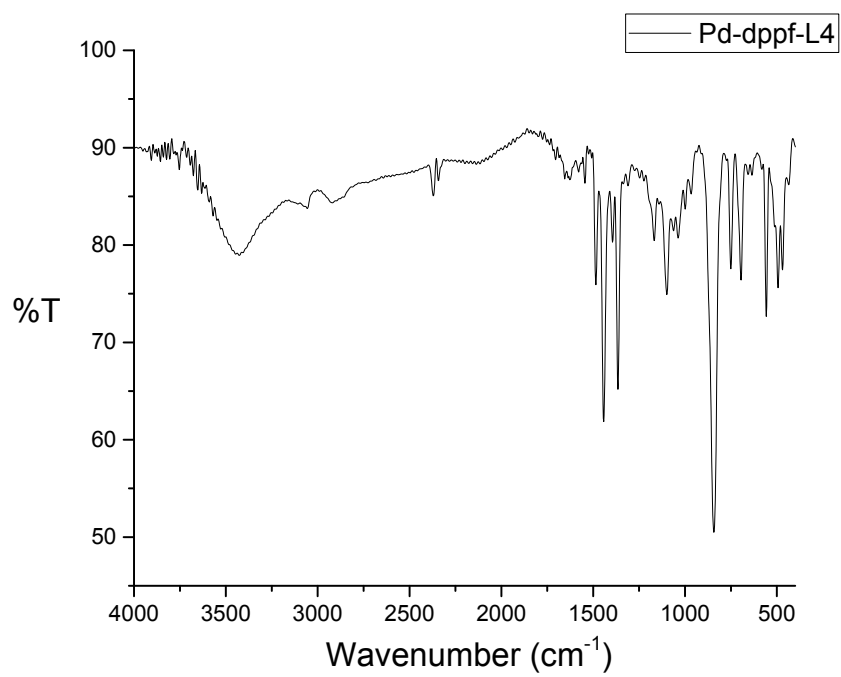



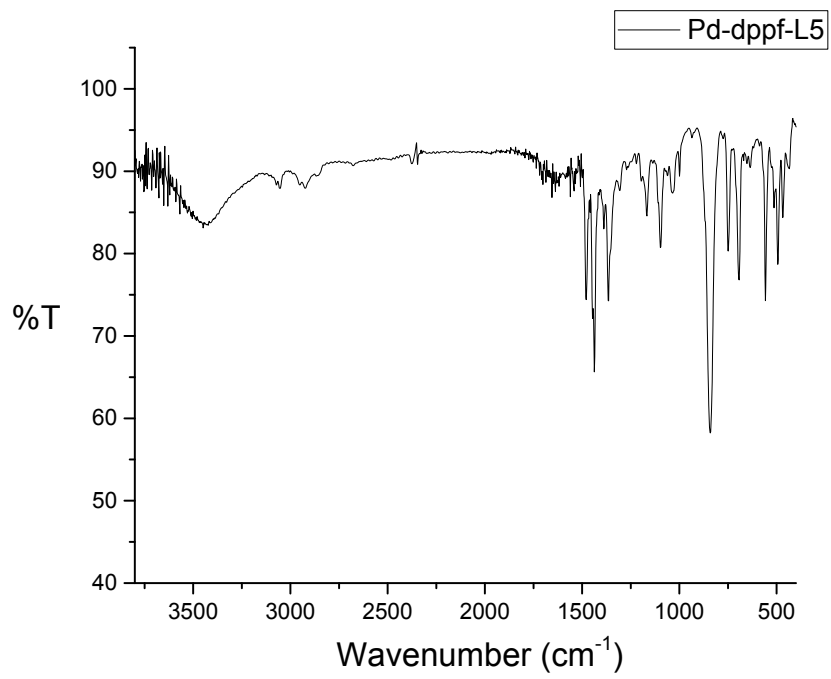

**Figures S2.**  $^1\text{H}$ -NMR spectra of complexes  $[\text{Pd}(\text{L})(\text{dppf})](\text{PF}_6)$  in  $\text{DMSO-}d_6$  solution, where  $\text{HL} = \text{HL1-HL5}$ , compared with the respective HL ligands.

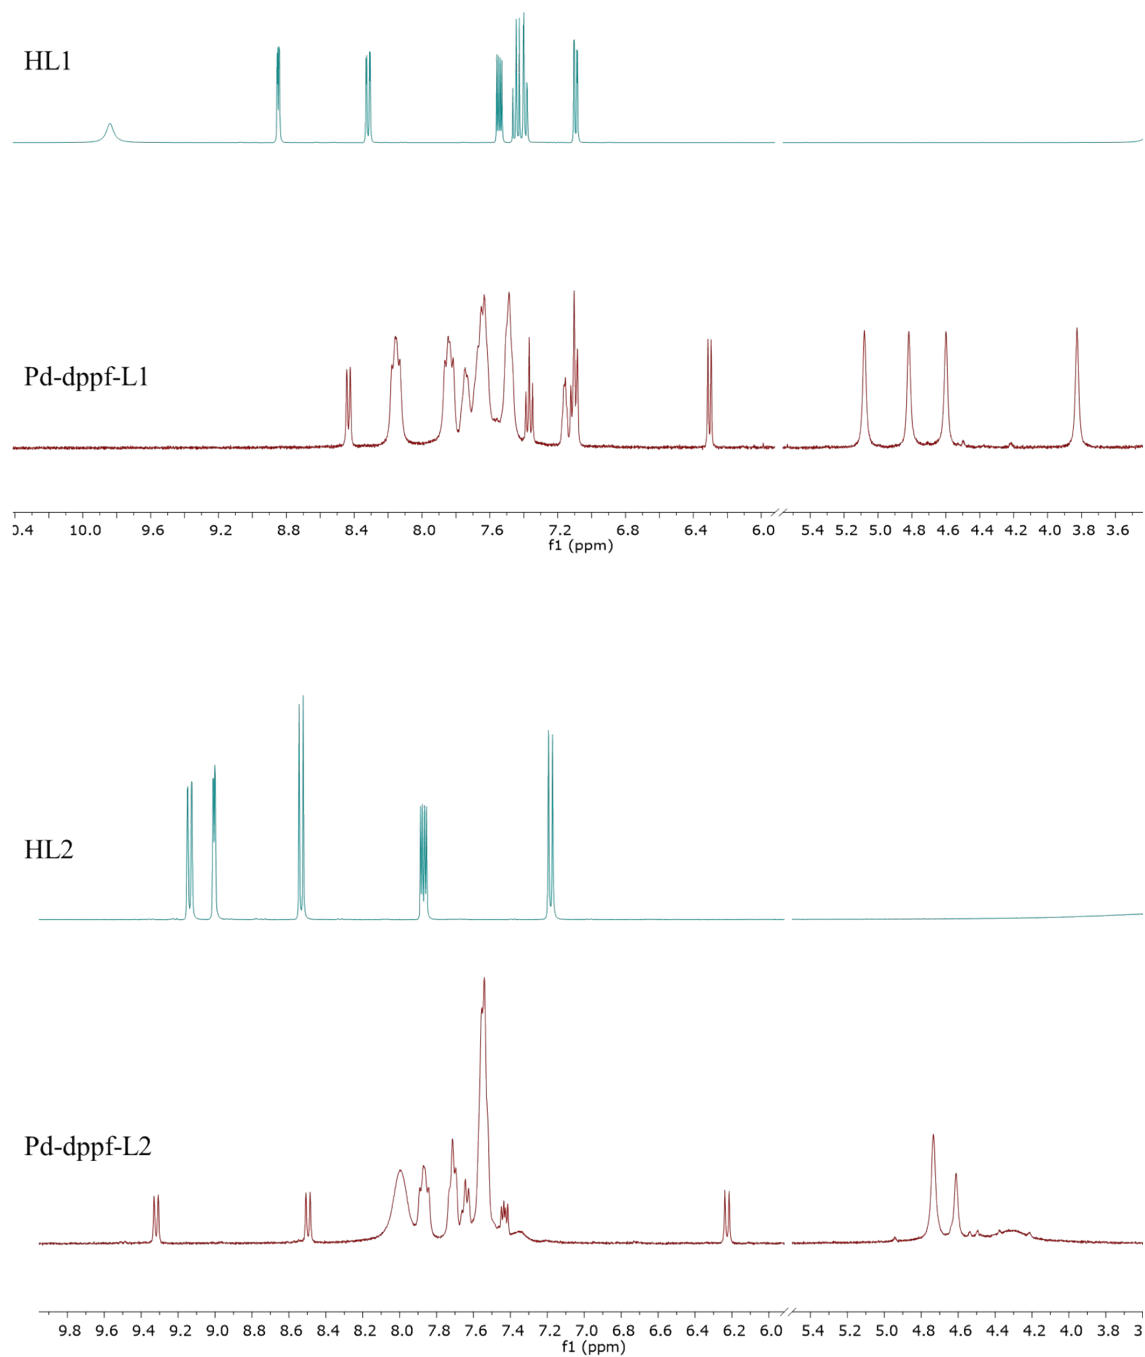

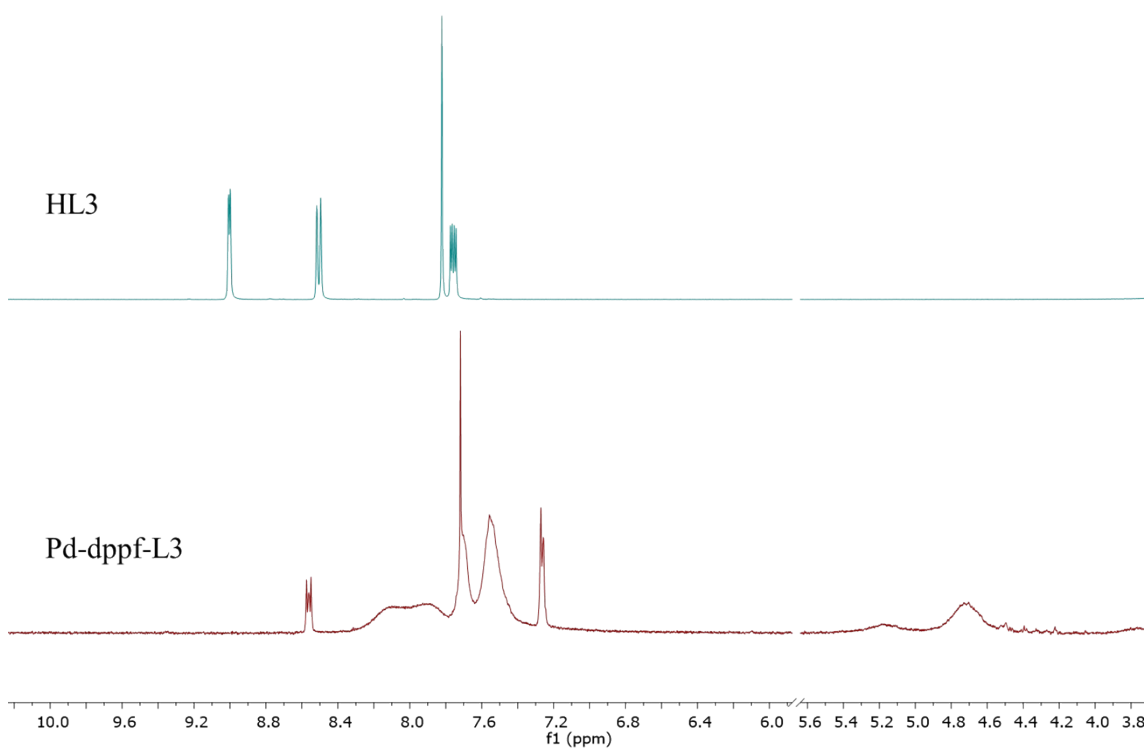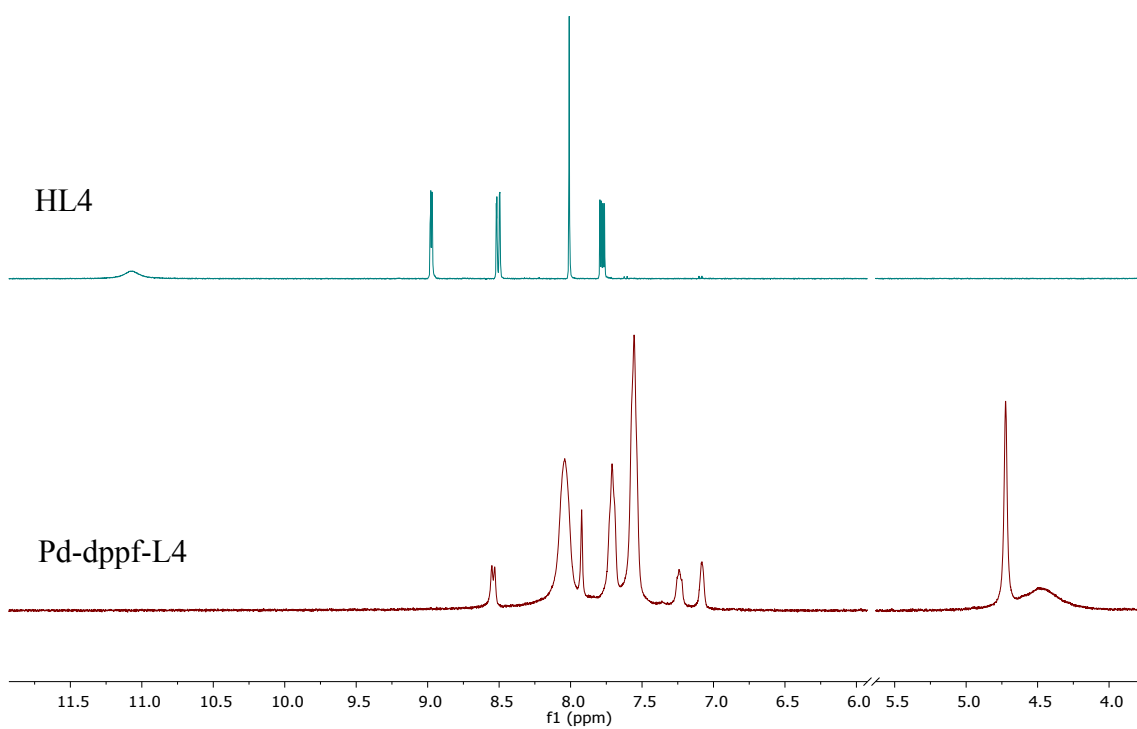

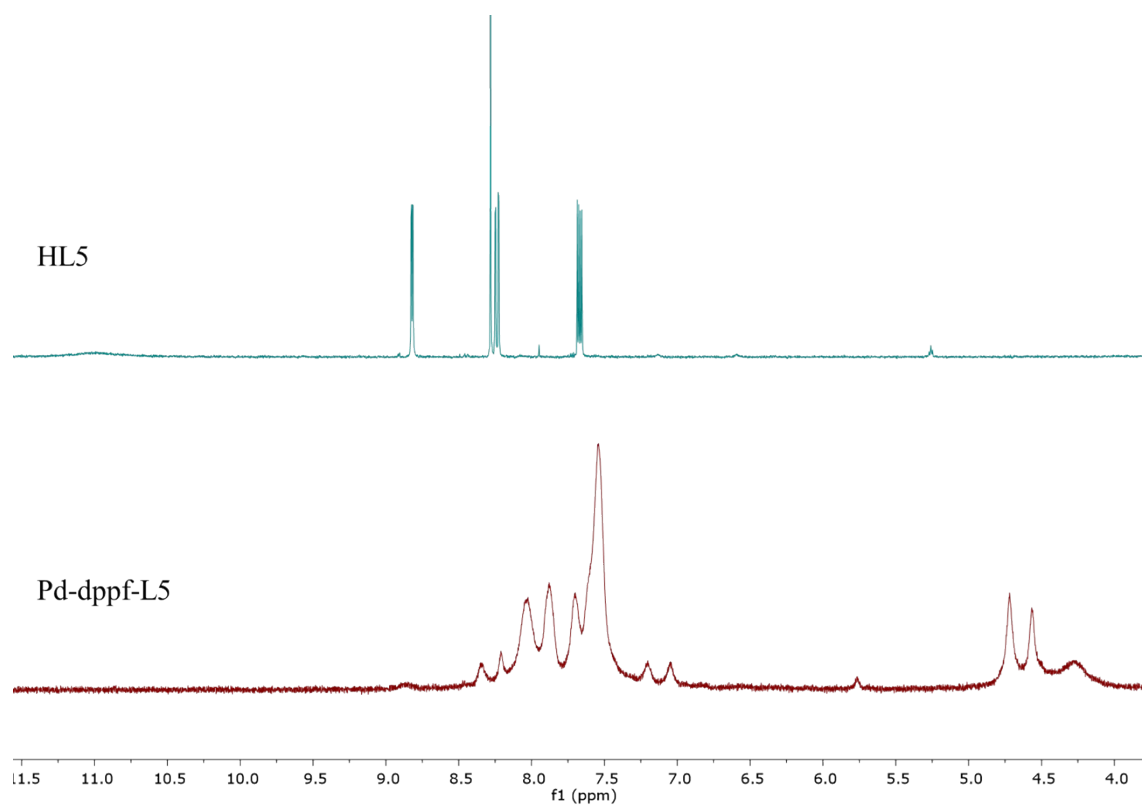

**Figure S3.** Chromatograms for Pd-dppf-L4 in DMSO/10 mM Tris-HCl buffer solution pH 7.4 (4:1) at t = 0 and t = 24 h.

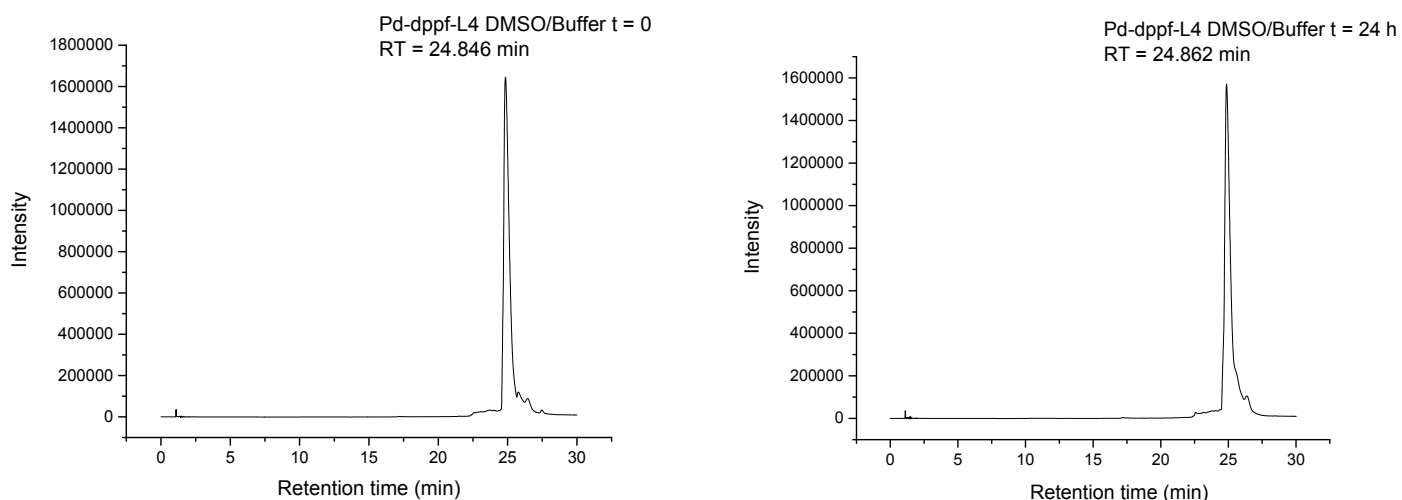

**Figure S4.** Chromatograms for Pt-dppf-L4 in DMSO/10 mM Tris-HCl buffer solution pH 7.4 (4:1) at t = 0 and t = 24 h

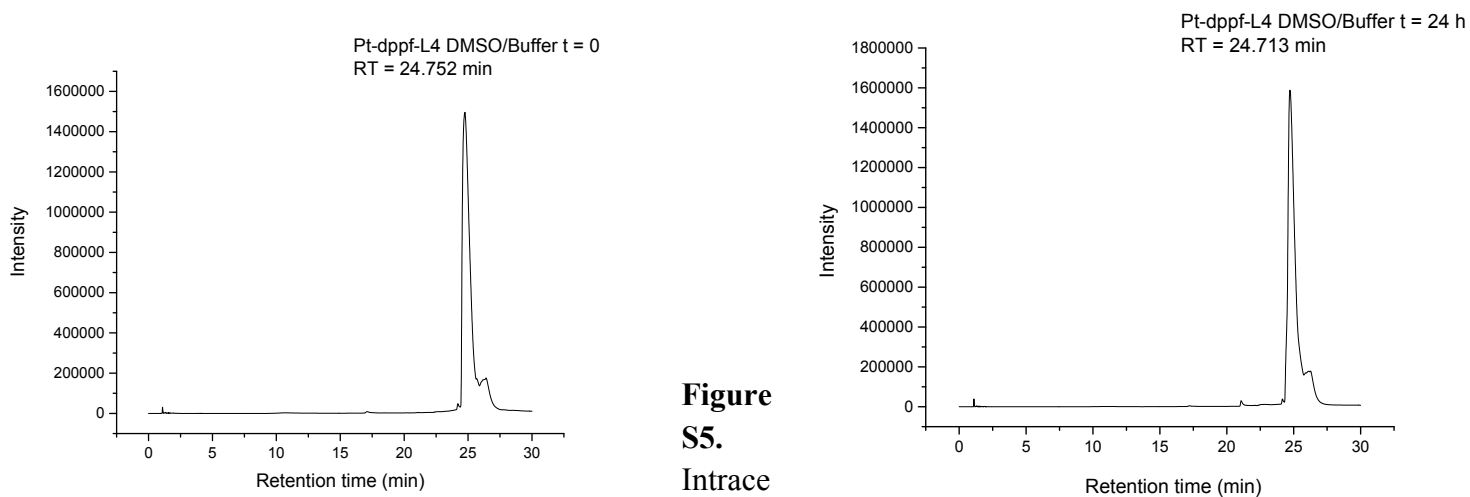

**Figure S5.**  
Intracellular

redox state of bloodstream *T. brucei* treated with the compounds under study. The bloodstream form of *T. b. brucei* ( $5 \times 10^5$  parasites/mL) was incubated 24 h with each compound at concentrations closest to their corresponding  $EC_{50}$  values (see Table below). Thereafter, the intracellular redox state was assessed by measuring fluorescence intensity of the redox biosensor hGrx-roGFP2 expressed by the parasites. Controls included parasites treated with vehicle (DMSO 1%, v/v, red bar). For details in the protocol see section Material and Methods. The results are expressed as mean % biosensor reduction

± S.D (n = 3) with respect to the vehicle-treated parasites (100% biosensor reduction, red bar). The probability index for the compound displaying a significant oxidation of the redox biosensor is shown as inset compared to DMSO (unpaired t-Test).

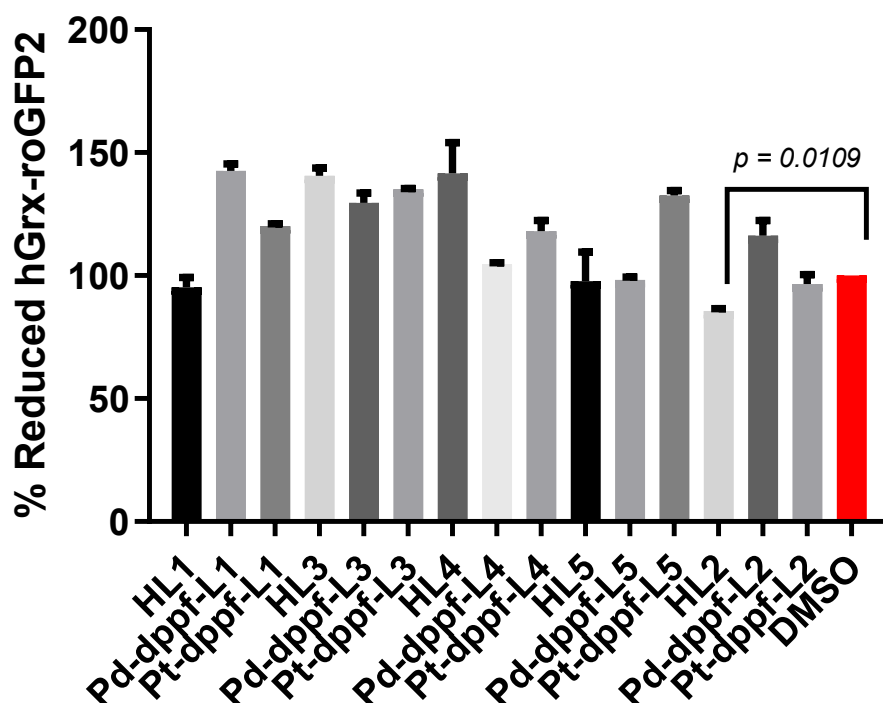

| Compound   | IC <sub>50</sub> <i>T. brucei</i> (μM) | Concentration tested in redox assay |
|------------|----------------------------------------|-------------------------------------|
| HL1        | 12.4 ± 0.8                             | 12.5 μM                             |
| Pd-dppf-L1 | 0.9 ± 0.2                              | 1 μM                                |
| Pt-dppf-L1 | 0.3 ± 0.1                              | 0.25 μM                             |
| HL3        | 2.5 ± 0.2                              | 2.5 μM                              |
| Pd-dppf-L3 | 4.5 ± 0.1                              | 2.5 μM                              |
| Pt-dppf-L3 | 0.22 ± 0.01                            | 0.25 μM                             |
| HL4        | 2.4 ± 0.4                              | 2.5 μM                              |
| Pd-dppf-L4 | 4.8 ± 0.5                              | 2.5 μM                              |
| Pt-dppf-L4 | 0.14 ± 0.05                            | 0.5 μM                              |
| HL5        | 3.0 ± 0.2                              | 2.5 μM                              |
| Pd-dppf-L5 | 7 ± 4                                  | 0.01 μM                             |
| Pt-dppf-L5 | 0.22 ± 0.04                            | 0.5 μM                              |
| HL2        | 0.8 ± 0.3                              | 1 μM                                |

|            |                 |              |
|------------|-----------------|--------------|
| Pd-dppf-L2 | $0.33 \pm 0.09$ | 0.25 $\mu$ M |
| Pt-dppf-L2 | $0.93 \pm 0.03$ | 1 $\mu$ M    |
